# Supplementary material
Source: HighWire-hosted journal article supplement (https://erj.ersjournals.com/content/59/3/2102806)

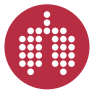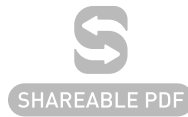

# Acute exacerbation of idiopathic pulmonary fibrosis after SARS-CoV-2 vaccination

Tomohiro Bando<sup>1</sup>, Reoto Takei<sup>1</sup>, Yoshikazu Mutoh<sup>2</sup>, Hajime Sasano <sup>1</sup>, Yasuhiko Yamano<sup>1</sup>, Toshiki Yokoyama<sup>1</sup>, Toshiaki Matsuda<sup>1</sup>, Kensuke Kataoka<sup>1</sup>, Tomoki Kimura<sup>1</sup> and Yasuhiro Kondoh<sup>1</sup>

<sup>1</sup>Dept of Respiratory Medicine and Allergy, Tosei General Hospital, Seto, Japan. <sup>2</sup>Dept of Infectious Diseases, Tosei General Hospital, Seto, Japan.

Corresponding author: Yasuhiro Kondoh ([kondoh@tosei.or.jp](mailto:kondoh@tosei.or.jp))

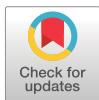

Shareable abstract (@ERSpublications)

**Although the association between acute exacerbation of interstitial lung disease and vaccination is not yet clarified, this is the first case report describing the possibility that SARS-CoV-2 vaccination may trigger acute exacerbation** <https://bit.ly/3tpu6Cz>

**Cite this article as:** Bando T, Takei R, Mutoh Y, *et al.* Acute exacerbation of idiopathic pulmonary fibrosis after SARS-CoV-2 vaccination. *Eur Respir J* 2022; 59: 2102806 [DOI: 10.1183/13993003.02806-2021].

This single-page version can be shared freely online.

Copyright ©The authors 2022.

This version is distributed under the terms of the Creative Commons Attribution Non-Commercial Licence 4.0. For commercial reproduction rights and permissions contact [permissions@ersnet.org](mailto:permissions@ersnet.org)

Received: 27 Oct 2021

Accepted: 23 Dec 2021

*To the Editor:*

Severe acute respiratory syndrome coronavirus 2 (SARS-CoV-2) infection has spread worldwide and coronavirus disease 2019 remains a major health concern. Several SARS-CoV-2 vaccines have been produced and are playing important roles in the prevention of infection and worsening to a severe state, and in improving mortality [1]. However, some concerns about adverse effects related to SARS-CoV-2 vaccination have been raised. Recently, various adverse effects have been reported, but there is little data on adverse effects on the lungs [2].

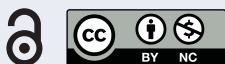

Supplement: inline-supplementary-material-1 [file inline-supplementary-material-1.pdf]
